# Supplementary material for: Comprehensive profiling of retroviral integration sites using target enrichment methods from historical koala samples without an assembled reference genome
Source: PeerJ journal article supplement (doi:10.7717/peerj.1847), 2016-03-28
Supplement: DataS2.pdf [file DataS2.pdf]

**Matched pairs of 5' and 3' integration sites that come from different koalas.**

>P\_3rS\_S2.74718\_S3.57590\_11S8\_\_C\_5fU\_3S8

TATTTGAGCTCAGGCAACTGGGGTTAAGTGACTTGCCCAGAGTCACAAGTCTGA  
GGTCGGATTTGAA

>P\_3rU\_4S8\_P\_3fU\_S8.70215\_\_C\_5fU\_S4.684182\_5fU\_S4.1661030

TTAAAGACAGCAATCTTCTGTCTATTCTTCAAGATTGGTTTGCCATTTCTTCTCC  
AGCTCATTTTATGGAT

>P\_3rU\_4S8\_P\_3fU\_S8.70215\_\_C\_5fU\_S4.1683056

TTAAAGACAGCAATCTTCTGTCTATTCTTCAAGATTGGTTTCTCATCTGTAAAAT  
GGGGATAATAACA

>P\_3rU\_S3.26225\_\_C\_5fU\_S8.589094

AATTGAGGAACTATGCCCAAAGGGCTATAAACTGCATACCCTTTGATCCAGCA  
ATACCACTTCTTGG G

>P\_3rU\_S8.97760\_\_C\_5fU\_S3.480683

ACTGAGCCATATAACCATATAGTATCTCATTGTAAACAAATCATTACATGCACAC  
ATTCCCACCAATGCATGCTGGACTTCCTGACAAAGTACAACATGCTCACCTGCC  
AACACTTGCTTGTTAAGACCTGTCAGTGGACTTGACCACTGATGGGTTATAGCTT  
GCATTT

>P\_3rS\_S5.105847\_5S8\_\_C\_5fU\_S4.1481035

TGAATGAACATTTTCTCTACTCCGCCATCTTGGCTCCACCCCCC

>C\_3rU\_S8.1018030\_P\_3rS\_S4.143028\_6S3\_S2.99154\_17S8\_P\_3fU\_2S8\_S\_3fU  
\_S20.58049\_\_P\_5rU\_S9.30145

GGCTGATTCGGA CT CAGGTGAGTCTTCCA ACTCCAGGGCTGGCACTCTATCCAT  
TCCCCACCTACCTGCCCTCCCCACATTCCTTC AAACCCTCTGTC

>P\_3rS\_S3.41285\_S4.156475\_S5.66477\_S7.113364\_S8.73375\_S9.5274\_36S2\_\_S  
\_5rU\_S18.20949\_C\_5rU\_S2.111871

AGGAGGTTGAACCAGATGACCTCTGGGGTCTCTTTTAGCC

>S\_3rU\_S17.112853\_P\_3rU\_8S2\_\_S\_5rU\_S23.5584\_2S20\_C\_5rS\_3S3\_S7.4344  
GTAAATTGGTCTGAGGCTGGATTTGAACTCAGGTC

>P\_3rU\_4S8\_P\_3fU\_S8.70215\_\_C\_5rU\_S4.1173169  
TTAAAGACAGCAATCTTCTGTCTATTCTTCAAGATTGGTTTGTCAATTCCTTCTCC  
AGCTCATG

>P\_3rS\_S2.74718\_S3.57590\_11S8\_\_C\_5rU\_S9.964451  
TATTTGAGCTCAGGCAACTGGGGTTAAGTGACTIONGCCAGATCGGAAGAGCGT

>C\_5fU\_S2.547057\_\_P\_3fU\_S4.4833  
TCAGCAATACAAGGATCTAAGACATCTCCA

>C\_5fU\_S8.1066112\_S8.1022169\_S8.1055816\_\_S\_3fU\_S20.2502  
TTCAAATCCGACCTCAGACTTGTGACTCTGGGCAAGTCACTTAACCCCAGTTGC  
CTCAGATCCAATTCACAT

>C\_5fU\_S4.684182\_5fU\_S4.1661030\_\_S\_3fU\_S17.64559\_P\_3fU\_S8.56518  
ATCCATAAAATGAGCTGGAGAAGGAAATGGCAACTIONAGTTTCCCAGTCTATTTCA  
TCCGGAGTTGT

>C\_5fU\_S4.1683056\_\_S\_3fU\_S17.64559\_P\_3fU\_S8.56518  
TGTTATTATCCCCATTTTACAGATGAGGAACTIONAGTTTCCCAGTCTATTTTCATCC  
GGAGTTGT

>C\_5fU\_S2.729164\_\_S\_3fU\_4S20\_P\_3fU\_S3.74019  
CTTTATTCACCTGTGCCACCTAGATGCCCTGAAGAATATATTTTAGGCATATAAA  
TGTGTAT

>C\_5fU\_S4.1481035\_\_P\_3fU\_S8.33956  
GGGGGGTGGAGCCAAGATGGCGGAGTAGAAGATGAGGAAAAGGCTCACAGAA  
GG

>S\_5rU\_cluster\_620\_C\_5rU\_2S8\_P\_5rU\_S8.78052\_\_P\_3fU\_S3.22152  
AGAGGTCCAGGCAAAGAGCTATGATCCCCGGTTTCTGCTTTCCTTCTAGTTAAA  
TCGGA

>C\_5rU\_S2.906334\_\_S\_3fU\_4S20\_P\_3fU\_S3.74019

GGTCACCCAGCTAGTAAATATCTGAGGCCAGATTTGAGTCTTTCTGACTTCAGG  
CCCTGCACTTTATTCAGTGTGCCACCTAGATGCCCTGAAGAATATATTTTAGGC  
ATATAAATGTGTAT

>C\_5rU\_2S3\_\_P\_3fS\_5S3\_S2.110884\_S8.68922

GGCCGGTGCTCTATTCAGTGTGCCACCTAGATGAGATCG

>C\_5rU\_S4.1173169\_\_S\_3fU\_S17.64559\_P\_3fU\_S8.56518

CATGAGCTGGAGAAGGAAATGACAACTAGTTTCCCAGTCTATTTTCATCCGGAG  
TTGT

>S\_5rU\_S23.5584\_2S20\_C\_5rS\_3S3\_S7.4344\_\_P\_3fS\_8s2\_1s5

GACCTGAGTTCAAATCCAGCCTCAGACAAATTCCAAGAAAAAGTTAGCTCTTTCC  
CCTTCCTCCCCCTC CTGTGCCAT

>P\_5rU\_S4.11115\_\_S\_3fU\_S20.10939\_P\_3fU\_S3.74062

TTCAAGCAGAAGACGGCATAACGAGATAGAGGCGGTGACTGGAGTTCAGACGTG  
TGCTTTGCCGATCTGAAGACACAGTAGTCAATGACTATAGTAGTCTTC
